# Supplementary material
Source: HighWire-hosted journal article supplement (https://emboj.embopress.org/content/embj.201488544/F6)

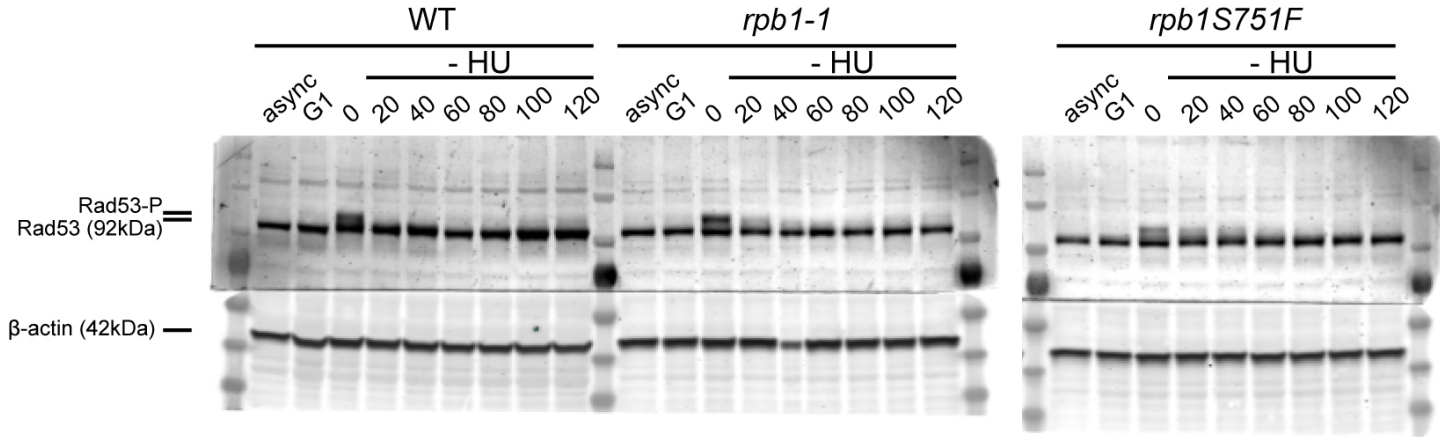

Supplement: inline-supplementary-material-3 [file inline-supplementary-material-3.pdf]
